# Supplementary material
Source: Springer Nature journal article supplement (https://www.springermedizin.de/resource/supplementary/12933_2010_312_MOESM3_ESM.pdf/9540076)

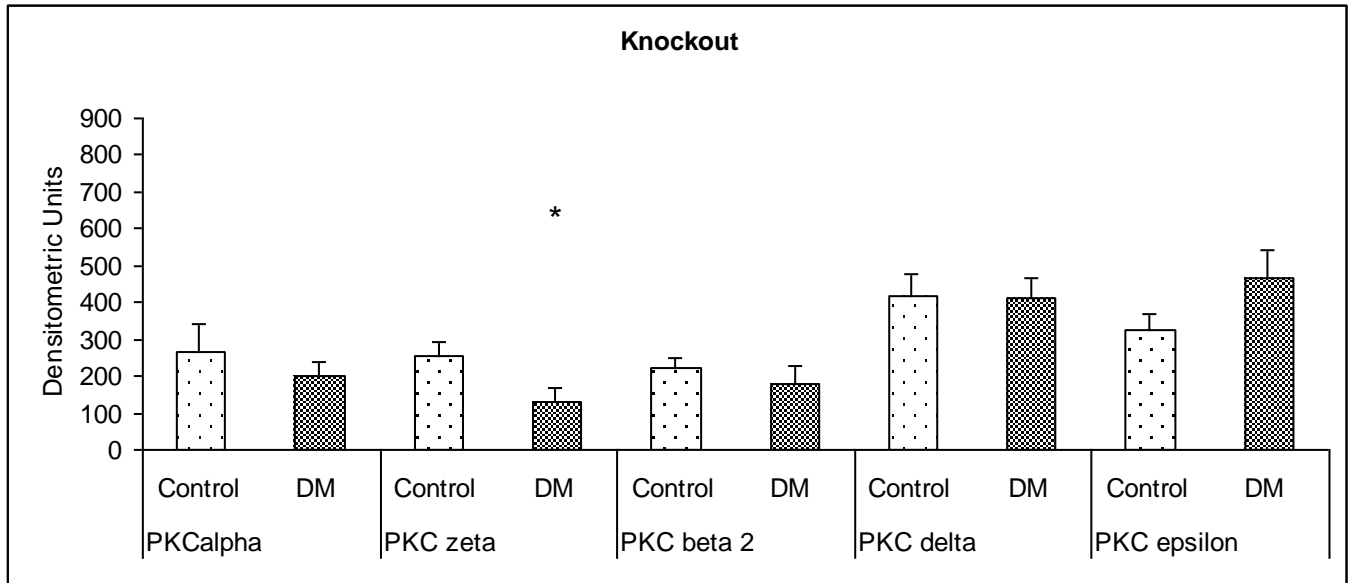

$G\alpha_{11}$  Knockout  
Control

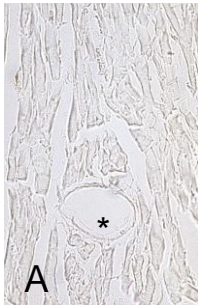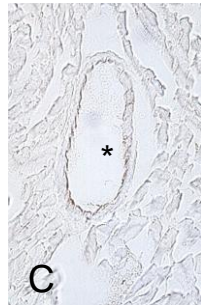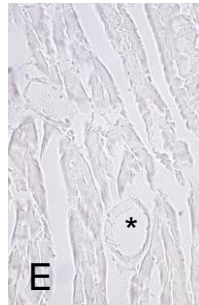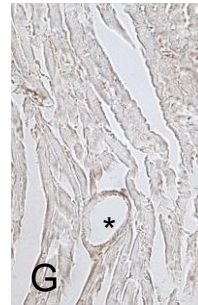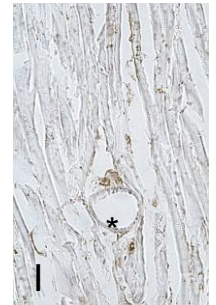

$G\alpha_{11}$  Knockout  
DM

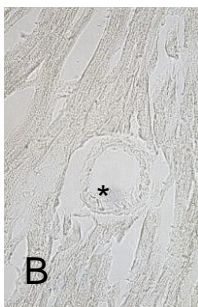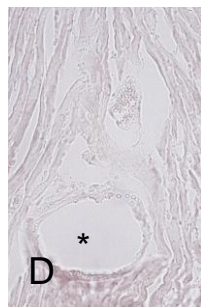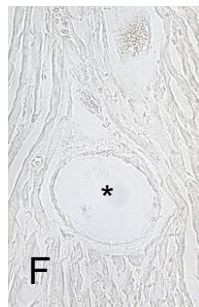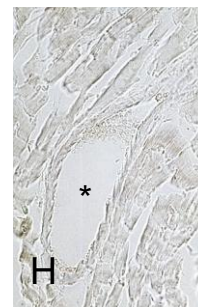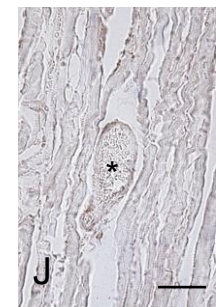

Supplement: MOESM3 [file 9540076]
